# Supplementary material
Source: ML conference proceedings conference paper supplement (https://openreview.net/forum?id=zVo6PfBa0K)

Comparison of NI2Domain and Prob2Domain

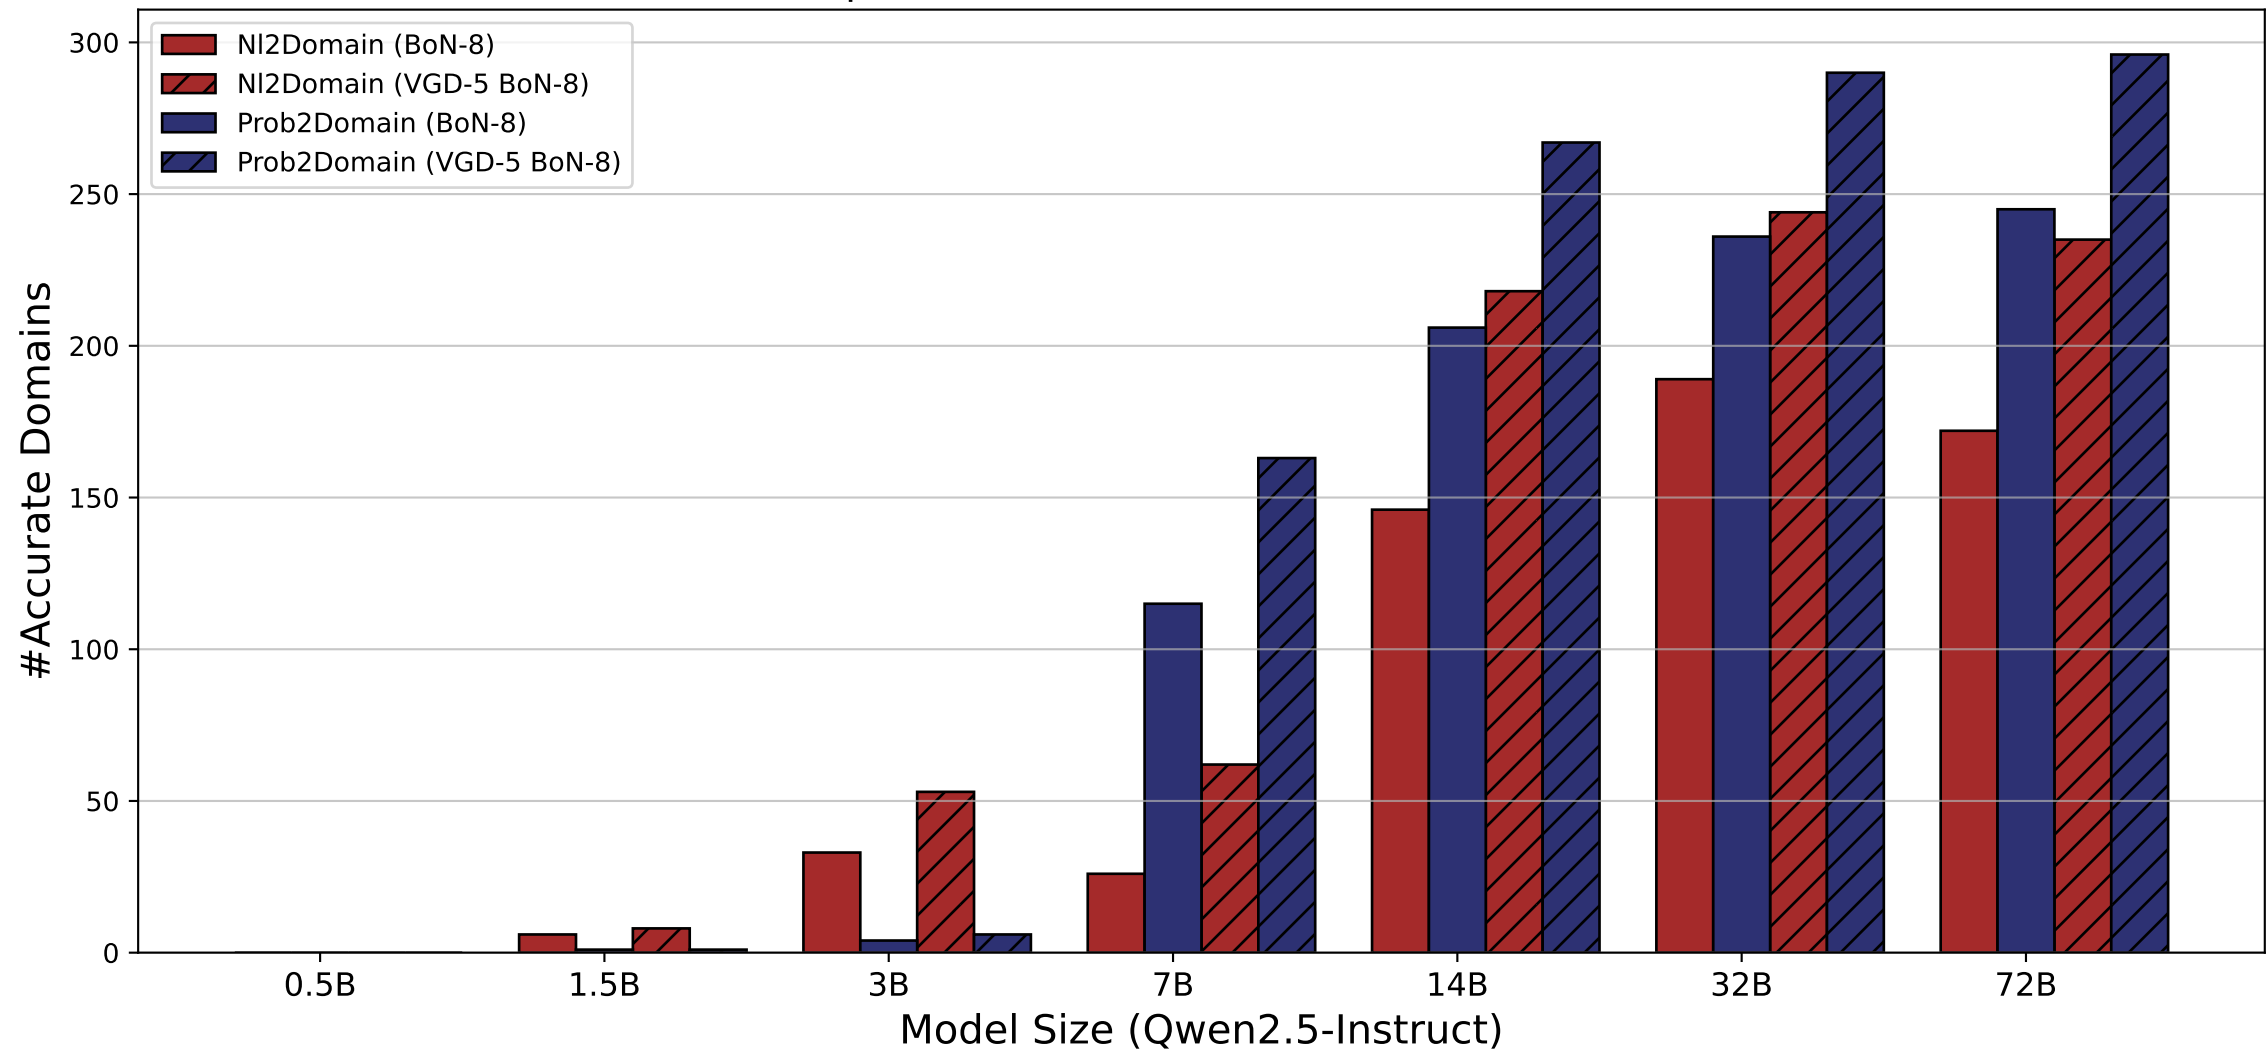

Supplement: supplementary_material [file attachment]

Scatter plot of Actions and Predicates

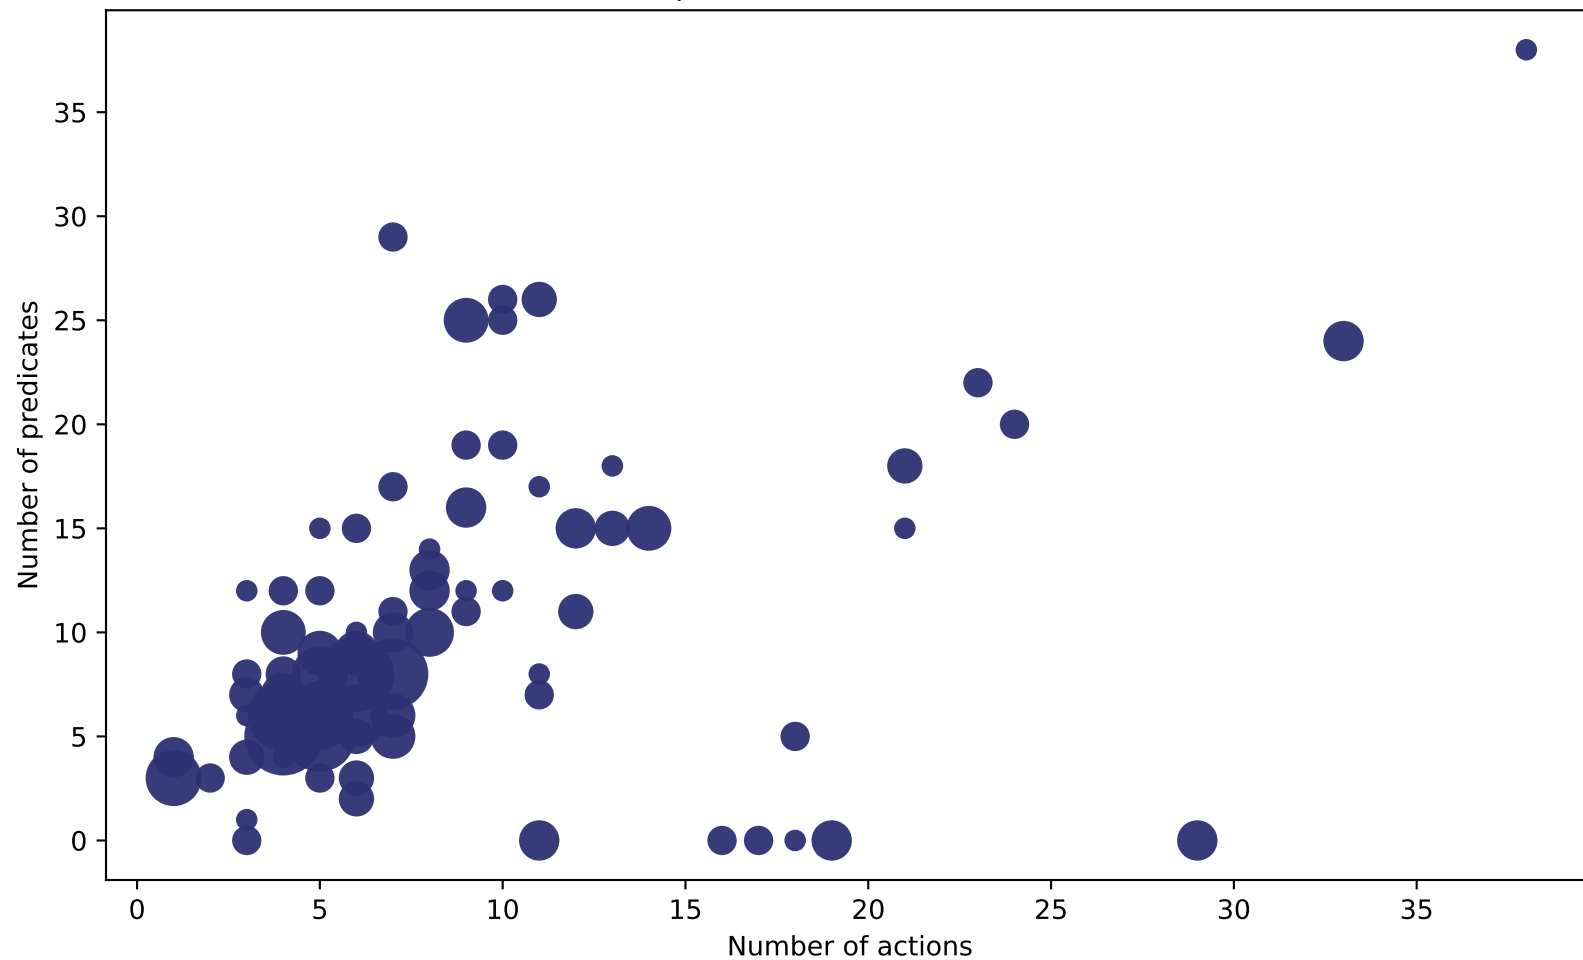

Supplement: supplementary_material [file attachment]

BoN-8

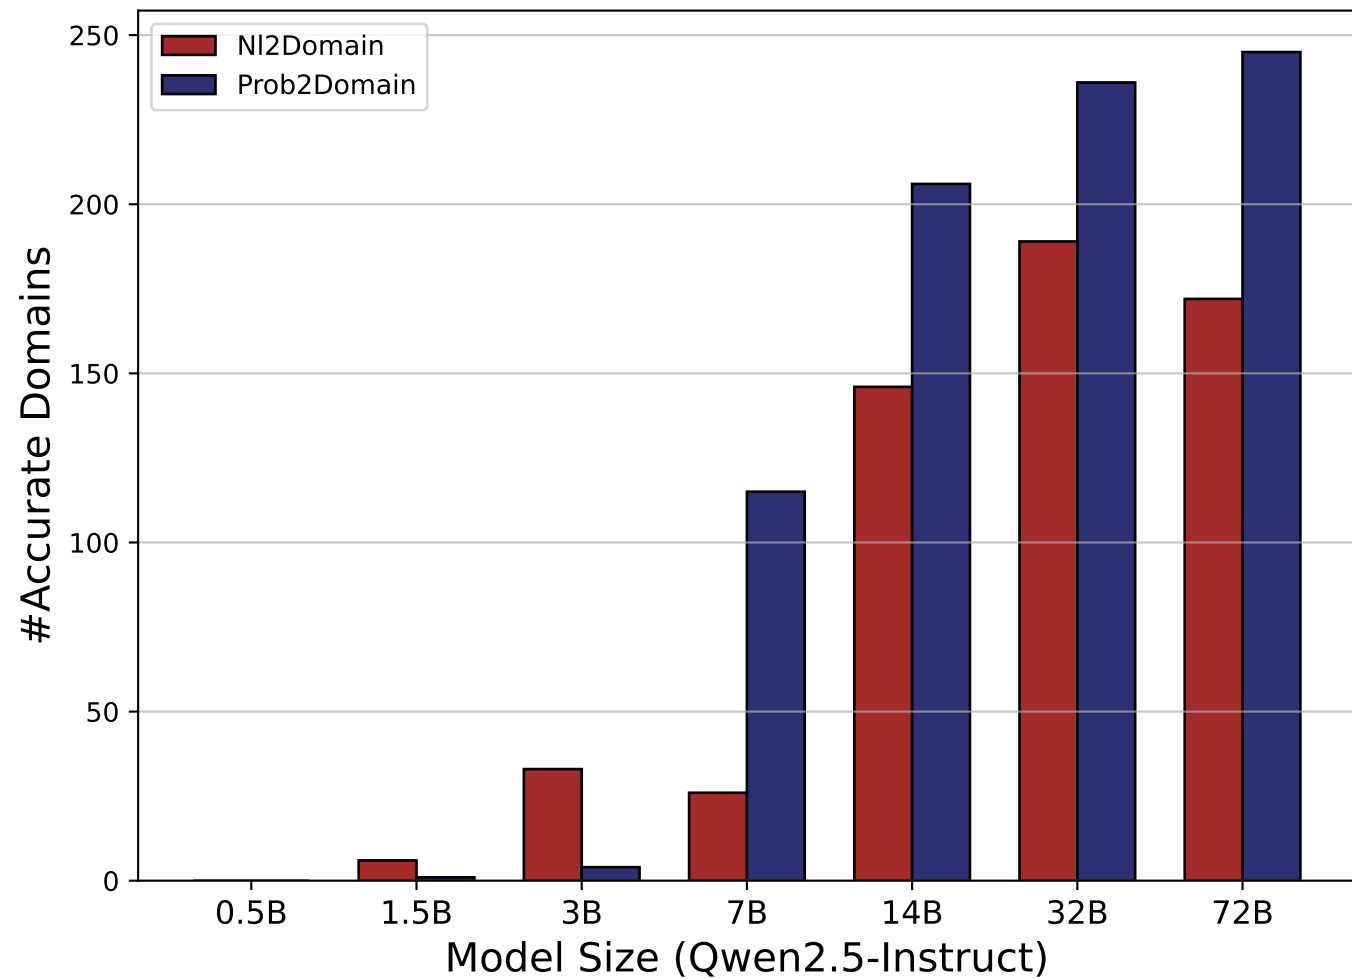

VGD-5 BoN-8

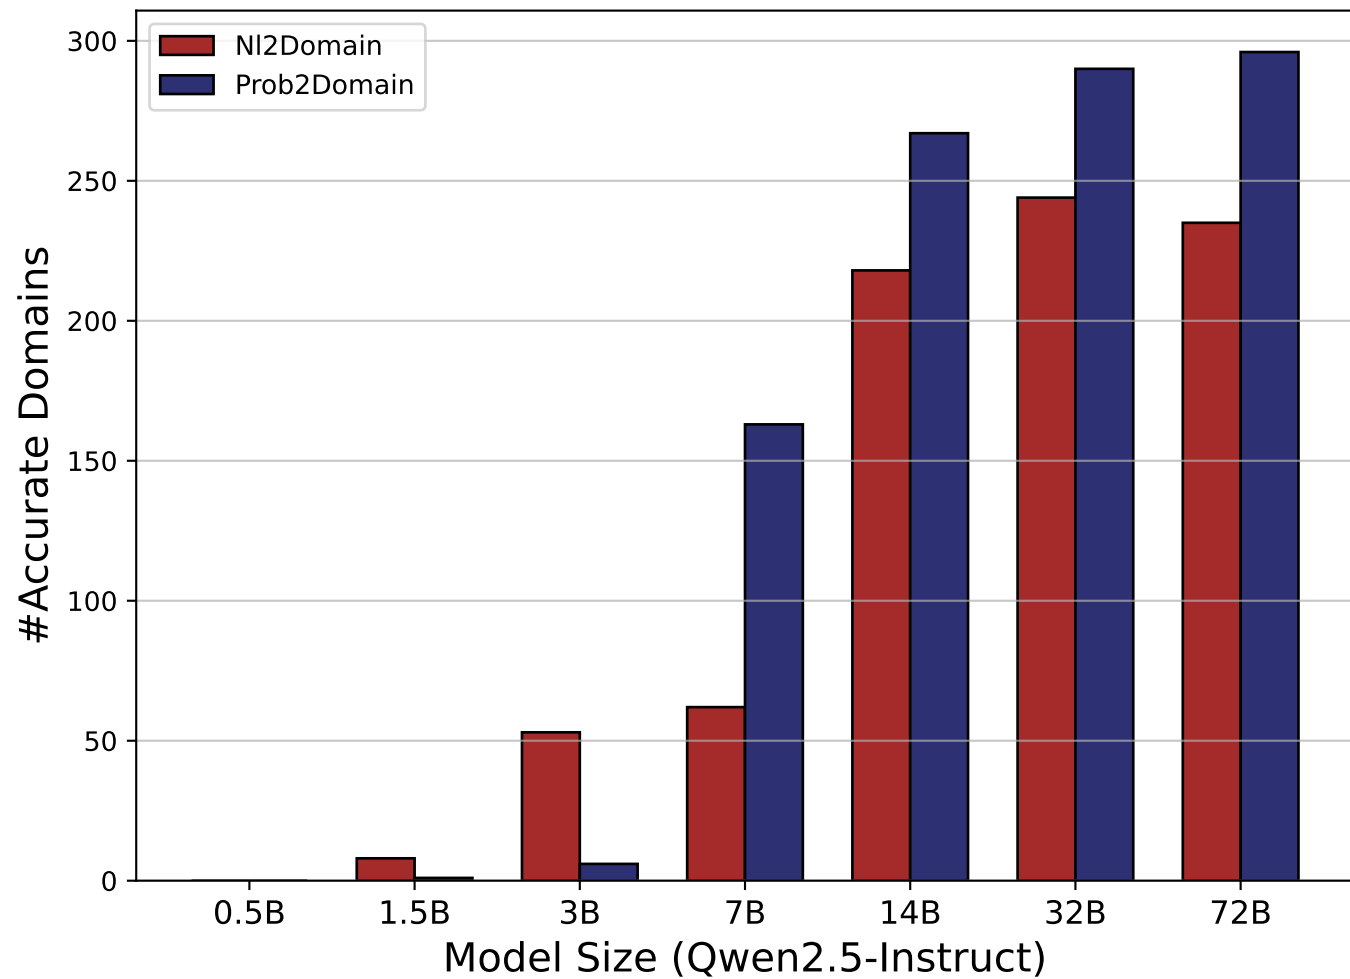

Supplement: supplementary_material [file attachment]

### Verbalized Gradient Descent

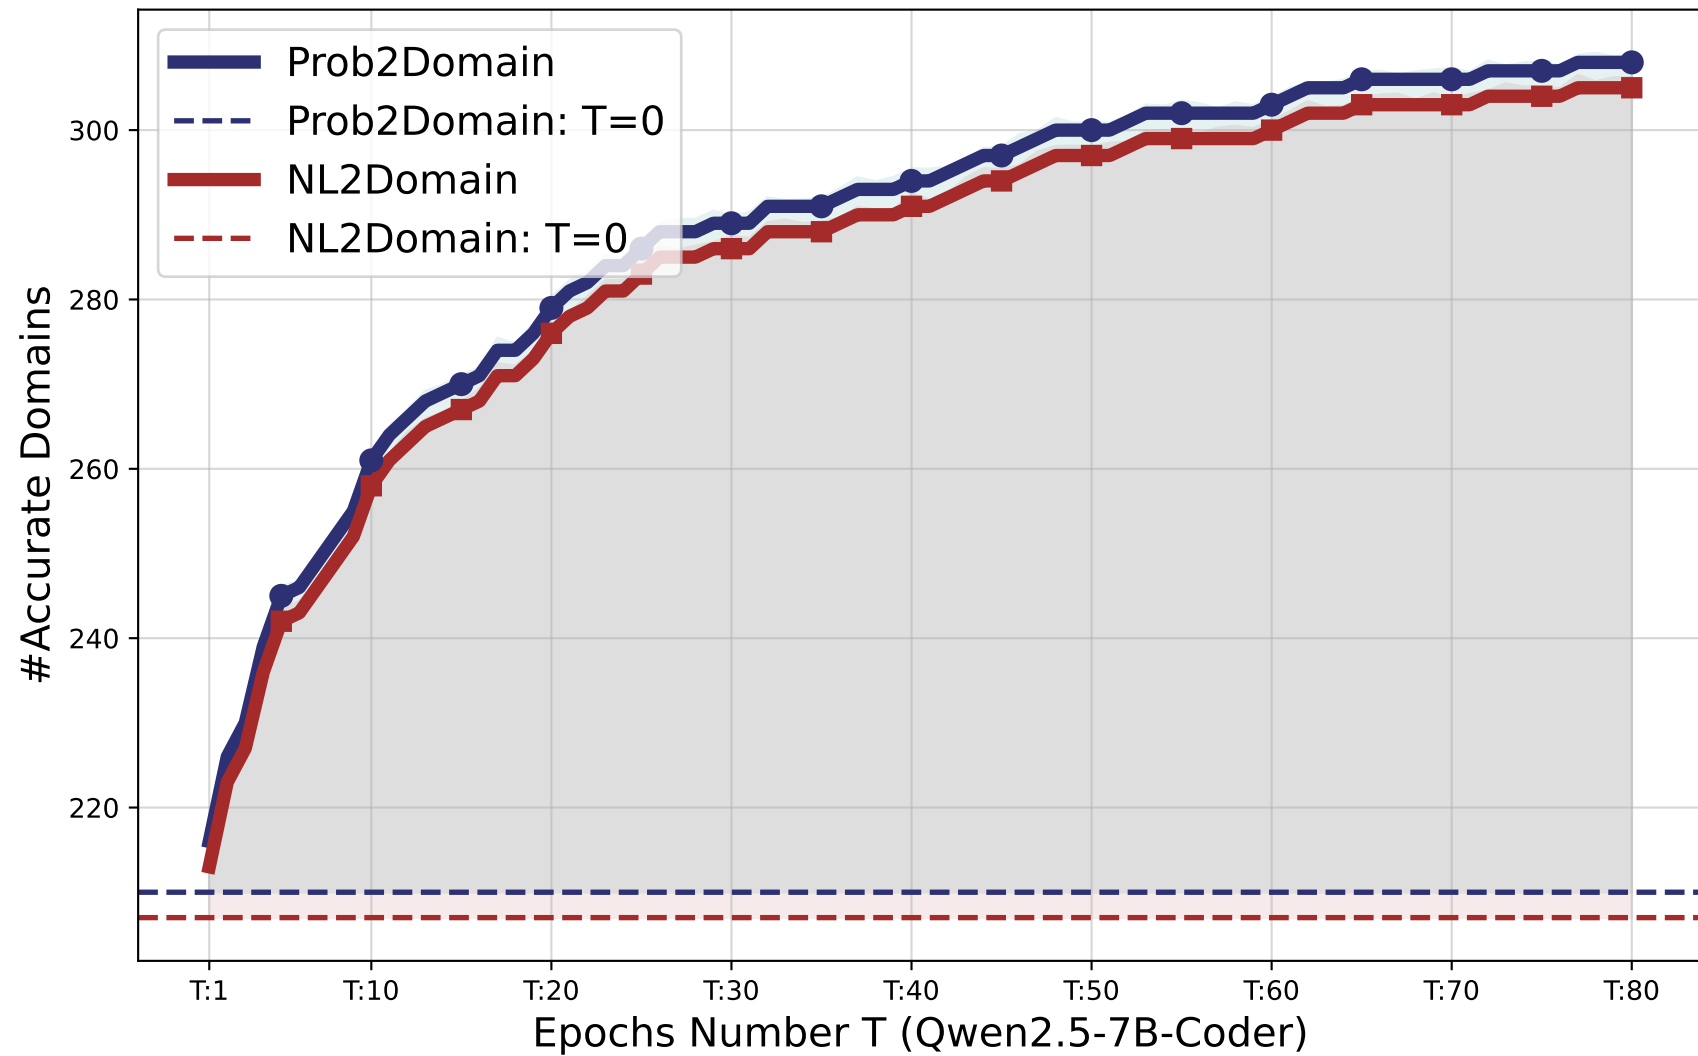

### BoN Sampling

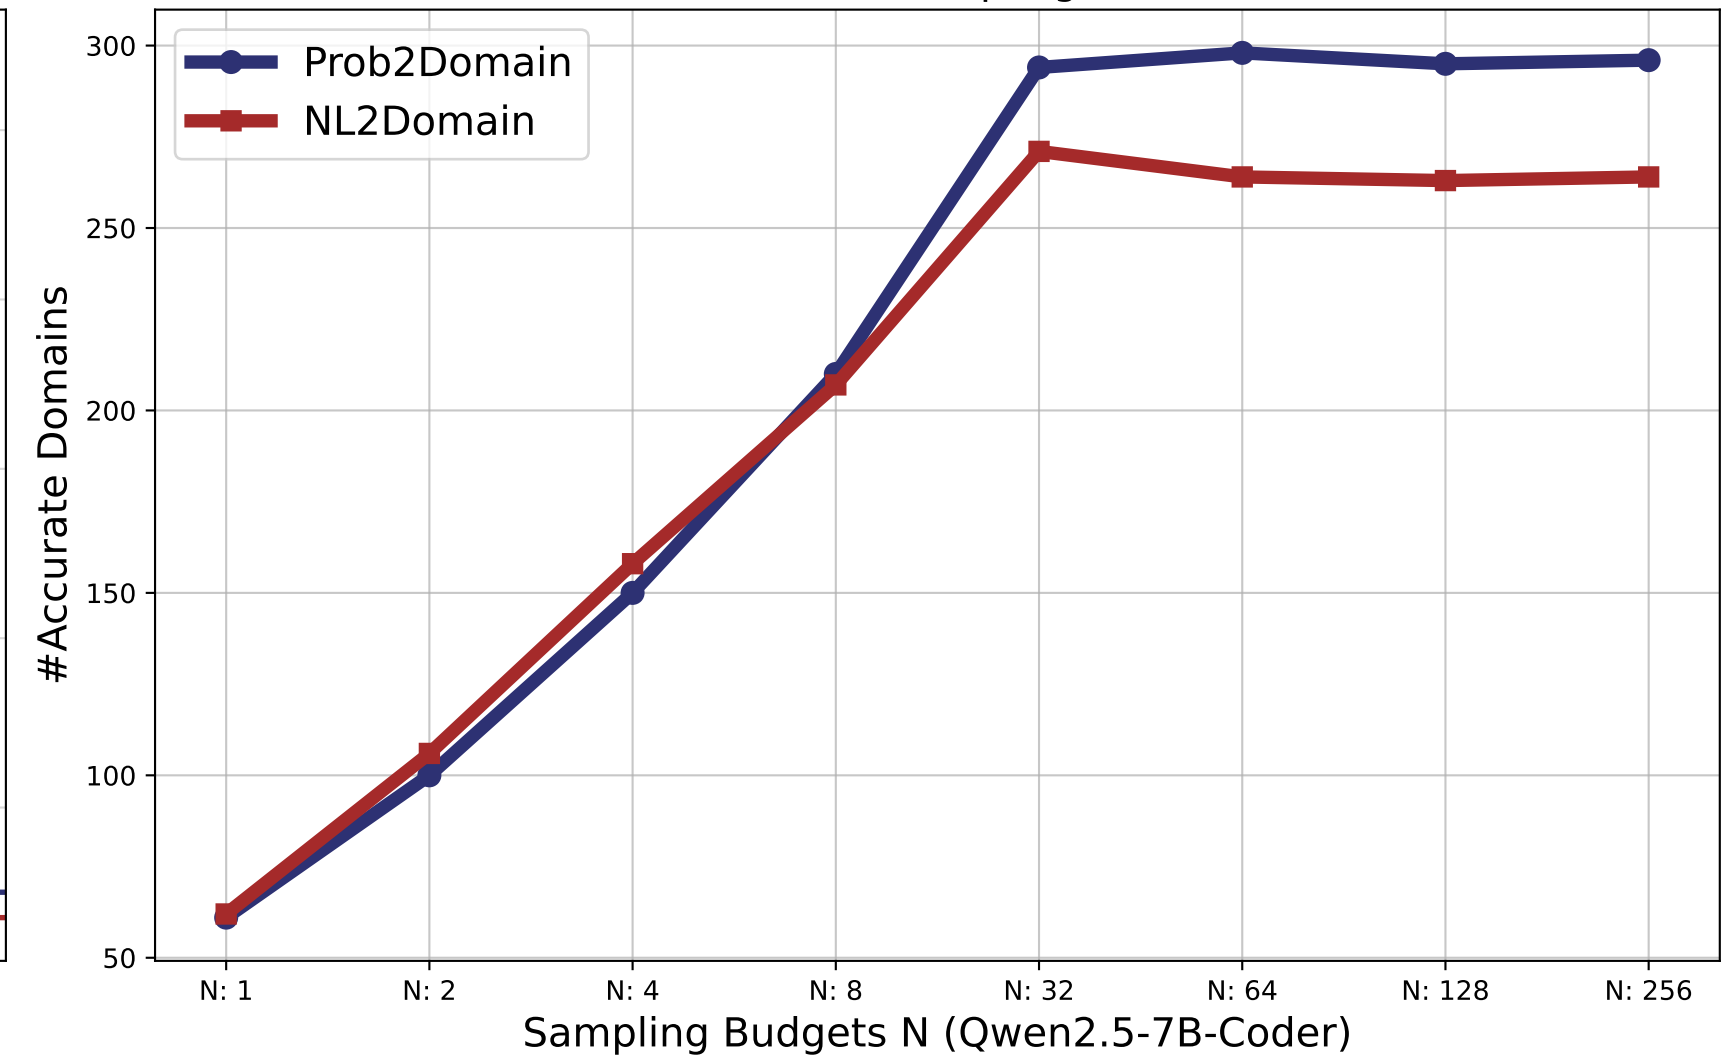

Supplement: supplementary_material [file attachment]
